# Supplementary material for: BSR1, a Rice Receptor-like Cytoplasmic Kinase, Positively Regulates Defense Responses to Herbivory
Source: MDPI journal article supplement (doi:10.3390/ijms241210395), 2023-06-20
Supplement: s1 [file s1]

**Supplemental Table S1.** Primers used for RT-qPCR in this work.

| Genes         | primer 1                    | primer 2                      |
|---------------|-----------------------------|-------------------------------|
| <i>PBZ1</i>   | CCGGCTTGGTCGACGACATT        | CCGACTTTAGGACATGACTT          |
| <i>PAL1</i>   | GCTATCAACGAAGGCAAGCAC       | GCCTCCACACTCCACTGTTATTC       |
| <i>DPF</i>    | CGTGCAAACCTAACATTACA        | GGCACCTCCCTTTTTCTTCTT         |
| <i>KSL4</i>   | GTATTTTCATGGGACAAAATCTCTGG  | CCATCCTTGCATTCCCTCTC          |
| <i>KSL7</i>   | TCTACTACCAGACCGACGGATTC     | GAGTTGAAGTGGCTCGTTGATG        |
| <i>KSL8</i>   | ATTAATTCCTACGTCTTGTTGCTTGGC | ATATGCGCGGGTTTTCTTCCTAGTTTTAG |
| <i>CPS2</i>   | CGTGAAGCGTGGAAGCAGT         | GCGTAGTCTGCACTGTTCTT          |
| <i>CPS4</i>   | TGACGAGGCTGGGCATATC         | TCTGGAGTCCAGTTCCTGAAA         |
| <i>RUBQ1</i>  | GGAGCTGCTGCTGTTCTAGG        | TTCAGACACCATCAAACCAGA         |
| <i>OsDXS3</i> | GGGGGAGGTTCCAGTAAGAA        | TCATTTTGCATTTGGAAGCA          |
| <i>OsLIS</i>  | TTTGATGGATTCATGACAGAGA      | CAACAAACTCTGCTGCATTTT         |
| <i>OsSAMT</i> | CTCATCGCTCGTCATTTCGG        | ACACACTGGCAGCTACTTA           |
| <i>OsEF1a</i> | CTGCCACACCTCCCACATTGC       | CCGCACGGCAAAACGACCA           |
| <i>WIPI</i>   | ATAATGCATGAACGCGAGCC        | TCCTTCACTCAGACAACGGC          |
| <i>PI</i>     | AAGTGTCAACAACCAGCCAGC       | TATGTCACTGCTACTCGGCA          |
| <i>OsPR1b</i> | ACGGGCGTACGTACTGGCTA        | CTCGGTATGGACCGTGAAG           |
